# Supplementary material for: Predicting olfactory receptor neuron responses from odorant structure
Source: PubMed Central journal article supplement (PMC1994056; doi:10.1186/1752-153x-1-11), 2007-05-04

# Predicting olfactory receptor neuron responses from odorant structure — additional file 1

Odorant molecules for which ORN responses were obtained in (1). Compound names are given in additional file 2: trainingResponses.xls.

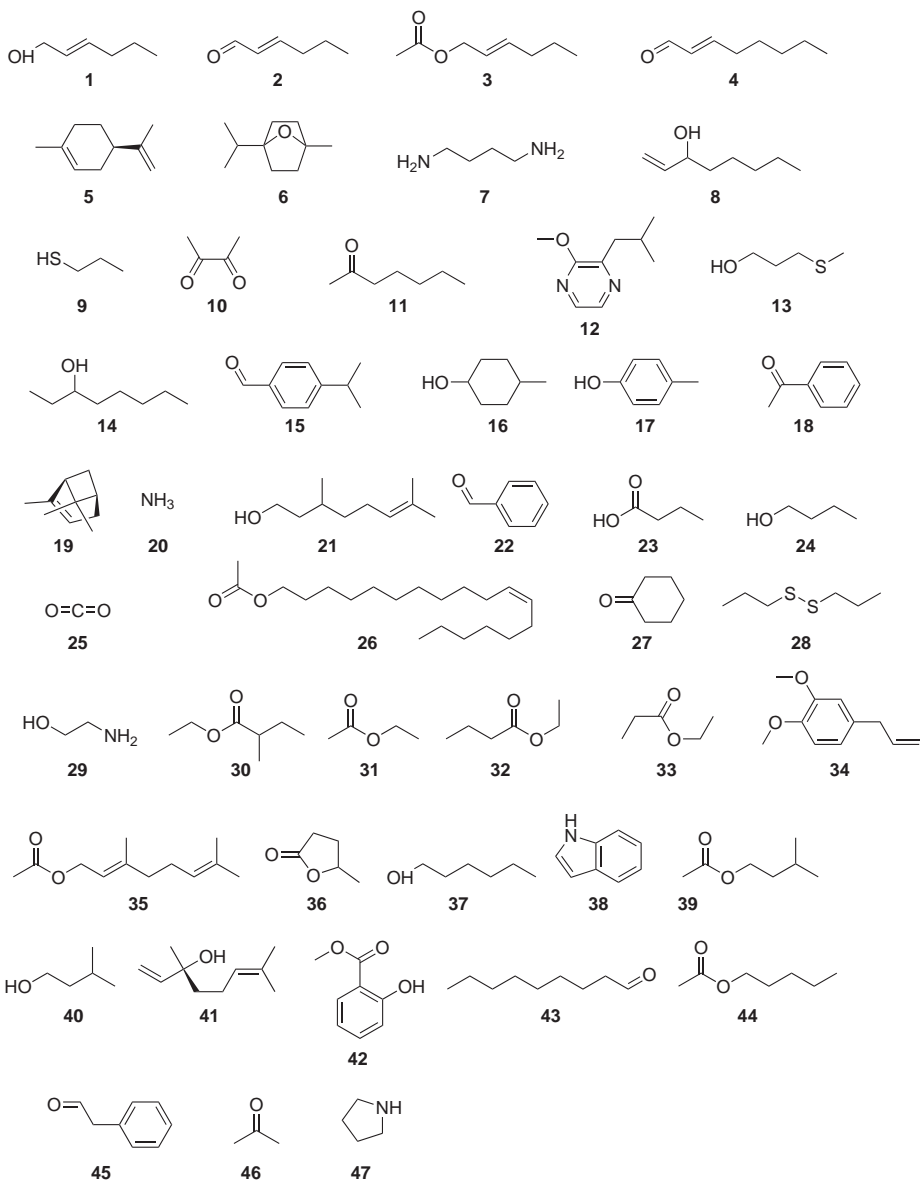

Supplement: 1752-153X-1-11-S1.pdf [file 1752-153X-1-11-S1.pdf]
