# Supplementary material for: Predicting olfactory receptor neuron responses from odorant structure
Source: PubMed Central journal article supplement (PMC1994056; doi:10.1186/1752-153x-1-11), 2007-05-04
Supplement: 1752-153X-1-11-S2.pdf [file 1752-153X-1-11-S2.pdf]

## TrainingResponses

Schmuker, de Bruyne, Hähnel and Schneider

### Predicting olfactory receptor neuron responses from odorant structure – additional file 2

| index | substance name                | ab1D       | ab2A       | ab2B      | ab3A       | ab3B       | ab5B       | ab6A       |
|-------|-------------------------------|------------|------------|-----------|------------|------------|------------|------------|
| 1     | (E)2-hexen-1-ol               | -3         | <b>-3</b>  | <b>56</b> | <b>2</b>   | <b>16</b>  | <b>0</b>   | <b>123</b> |
| 2     | (E)2-hexenal                  | 1          | <b>-1</b>  | <b>2</b>  | <b>3</b>   | (24)       | <b>2</b>   | <b>85</b>  |
| 3     | (E)2-hexenyl acetate          | -3         | <b>8</b>   | 0         | <b>114</b> | -11        | <b>22</b>  | <b>78</b>  |
| 4     | (E)2-octenal                  | 1          | <b>-3</b>  | <b>3</b>  | (20)       | 8          | <b>3</b>   | <b>71</b>  |
| 5     | (R)-(+)-limonene              | -2         | -7         | <b>1</b>  | -4         | -6         | -8         | <b>-8</b>  |
| 6     | 1,4-cineole                   | -4         | <b>-2</b>  | <b>1</b>  | <b>-1</b>  | 3          | <b>0</b>   | <b>-6</b>  |
| 7     | 1,4-diaminobutane             | -1         | -11        | -1        | <b>-1</b>  | <b>19</b>  | (13)       | <b>3</b>   |
| 8     | 1-octen-3-ol                  | 0          | <b>-3</b>  | (14)      | <b>49</b>  | <b>39</b>  | (13)       | <b>175</b> |
| 9     | 1-propanethiol                | 3          | -11        | <b>2</b>  | <b>5</b>   | (22)       | <b>7</b>   | <b>-1</b>  |
| 10    | 2,3-butanedione               | 2          | <b>102</b> | <b>1</b>  | (21)       | <b>46</b>  | -5         | <b>42</b>  |
| 11    | 2-heptanone                   | 0          | <b>5</b>   | <b>1</b>  | <b>33</b>  | <b>122</b> | <b>70</b>  | <b>48</b>  |
| 12    | 2-isobutyl-3-methoxy-pyrazine | 6          | <b>-4</b>  | -1        | -6         | 2          | <b>-4</b>  | <b>-3</b>  |
| 13    | 3-(methylthio)-1-propanol     | 9          | -7         | <b>4</b>  | <b>2</b>   | 10         | <b>152</b> | <b>14</b>  |
| 14    | 3-octanol                     | 2          | <b>-2</b>  | <b>7</b>  | <b>57</b>  | <b>112</b> | <b>27</b>  | <b>162</b> |
| 15    | 4-isopropylbenzaldehyde       | 13         | <b>-2</b>  | <b>1</b>  | -7         | <b>16</b>  | <b>-1</b>  | <b>-14</b> |
| 16    | 4-methylcyclohexanol          | 7          | <b>0</b>   | <b>3</b>  | (13)       | 4          | <b>-2</b>  | <b>-15</b> |
| 17    | 4-methylphenol                | (22)       | <b>-3</b>  | 0         | <b>-1</b>  | (31)       | <b>1</b>   | <b>-12</b> |
| 18    | Acetophenone                  | <b>157</b> | -8         | <b>2</b>  | -7         | 1          | <b>1</b>   | <b>-15</b> |
| 19    | alpha-pinene                  | -4         | -8         | 0         | -3         | <b>13</b>  | -5         | <b>12</b>  |
| 20    | Ammonia                       | 5          | -10        | -1        | <b>-1</b>  | <b>17</b>  | <b>5</b>   | <b>-10</b> |
| 21    | beta-citronellol              | -6         | -7         | <b>3</b>  | -5         | 12         | <b>4</b>   | <b>53</b>  |
| 22    | Benzaldehyde                  | 49         | -8         | <b>1</b>  | -5         | 3          | <b>-1</b>  | <b>-13</b> |
| 23    | Butanoic acid                 | 1          | <b>-2</b>  | <b>1</b>  | (20)       | 2          | <b>-4</b>  | <b>82</b>  |
| 24    | Butanol                       | 0          | <b>13</b>  | <b>2</b>  | (11)       | 11         | -5         | <b>-16</b> |
| 25    | Carbon dioxide                | 0          | <b>5</b>   | <b>1</b>  | <b>4</b>   | <b>14</b>  | <b>1</b>   | <b>10</b>  |
| 26    | cis-vaccenyl acetate          | 5          | -6         | <b>1</b>  | (13)       | -12        | <b>-1</b>  | <b>-16</b> |
| 27    | Cyclohexanone                 | -8         | <b>-2</b>  | -1        | <b>3</b>   | -1         | <b>-2</b>  | <b>-15</b> |
| 28    | Dipropyldisulphide            | 6          | -10        | -2        | <b>2</b>   | 8          | <b>5</b>   | <b>4</b>   |
| 29    | Ethanolamine                  | 0          | -9         | <b>5</b>  | <b>4</b>   | 9          | <b>8</b>   | <b>-6</b>  |
| 30    | Ethyl 2-methylbutanoate       | 6          | <b>14</b>  | <b>23</b> | <b>141</b> | -7         | <b>2</b>   | <b>2</b>   |

TrainingResponses

|                     |                      |            |            |           |            |           |            |            |
|---------------------|----------------------|------------|------------|-----------|------------|-----------|------------|------------|
| 31                  | Ethyl acetate        | 4          | <b>156</b> | <b>1</b>  | (14)       | 9         | <b>8</b>   | <b>9</b>   |
| 32                  | Ethyl butanoate      | 4          | (23)       | <b>73</b> | <b>145</b> | 5         | <b>3</b>   | <b>-2</b>  |
| 33                  | Ethyl propionate     | -1         | <b>69</b>  | (20)      | <b>60</b>  | -10       | <b>8</b>   | <b>-12</b> |
| 34                  | Eugenol methyl ether | 11         | <b>-1</b>  | <b>1</b>  | -7         | 11        | <b>-1</b>  | <b>-15</b> |
| 35                  | Geranyl acetate      | 2          | <b>5</b>   | 0         | <b>1</b>   | (29)      | -5         | (26)       |
| 36                  | gamma-valerolactone  | 32         | <b>-2</b>  | <b>23</b> | <b>32</b>  | -2        | <b>-2</b>  | <b>47</b>  |
| 37                  | Hexanol              | 3          | <b>8</b>   | <b>67</b> | (20)       | <b>87</b> | <b>5</b>   | <b>134</b> |
| 38                  | Indole               | 4          | <b>0</b>   | <b>1</b>  | <b>-1</b>  | 10        | <b>-3</b>  | <b>5</b>   |
| 39                  | Iso-amyl acetate     | 50         | <b>7</b>   | <b>9</b>  | <b>104</b> | 8         | <b>45</b>  | (24)       |
| 40                  | Iso-amyl alcohol     | 1          | <b>1</b>   | <b>4</b>  | (14)       | 6         | <b>1</b>   | <b>-10</b> |
| 41                  | Linalool             | -2         | -7         | -4        | <b>-1</b>  | <b>14</b> | <b>-1</b>  | (36)       |
| 42                  | Methyl salicylate    | <b>187</b> | <b>-2</b>  | <b>3</b>  | <b>4</b>   | 3         | <b>-3</b>  | <b>5</b>   |
| 43                  | Nonanal              | 1          | <b>-5</b>  | -1        | -4         | 6         | <b>-4</b>  | <b>-9</b>  |
| 44                  | Pentyl acetate       | 5          | (23)       | <b>2</b>  | <b>111</b> | (25)      | <b>198</b> | <b>69</b>  |
| 45                  | Phenylacetaldehyde   | 76         | -6         | 0         | -3         | 12        | -5         | -19        |
| 46                  | Propanone            | -3         | <b>88</b>  | <b>1</b>  | <b>1</b>   | 2         | <b>1</b>   | (35)       |
| 47                  | Pyrrolidine          | 2          | <b>-5</b>  | <b>6</b>  | -4         | (24)      | <b>-1</b>  | (28)       |
| lower threshold     |                      | 20         | 20         | 10        | 10         | 20        | 10         | 20         |
| upper threshold     |                      | 30         | 30         | 20        | 30         | 35        | 20         | 40         |
| number of actives   |                      | 6          | 4          | 6         | 10         | 5         | 6          | 13         |
| number of inactives |                      | 40         | 41         | 40        | 28         | 36        | 39         | 29         |
