# Supplementary material for: Predicting olfactory receptor neuron responses from odorant structure
Source: PubMed Central journal article supplement (PMC1994056; doi:10.1186/1752-153x-1-11), 2007-05-04

## Predicting olfactory receptor neuron responses from odorant structure — additional file 3

These odorants were screened to check prediction quality. Compound names are given in additional file 4: testResponses.xls.

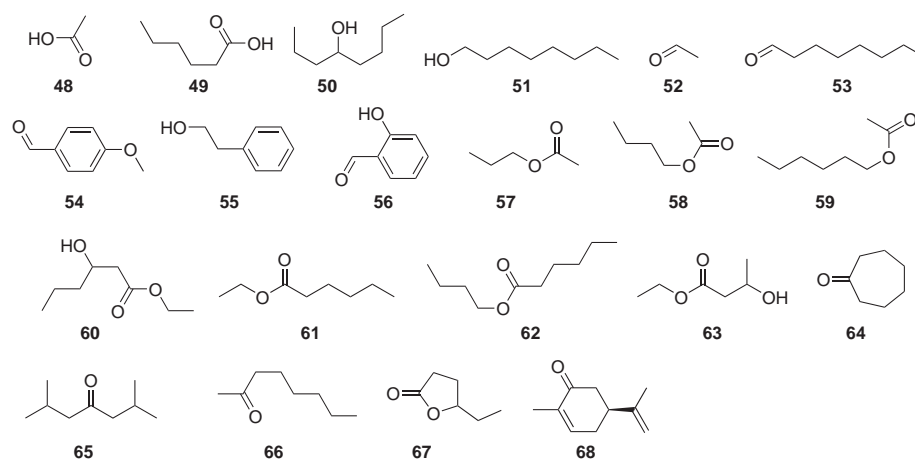

Supplement: 1752-153X-1-11-S3.pdf [file 1752-153X-1-11-S3.pdf]
