# Supplementary material for: Predicting olfactory receptor neuron responses from odorant structure
Source: PubMed Central journal article supplement (PMC1994056; doi:10.1186/1752-153x-1-11), 2007-05-04
Supplement: 1752-153X-1-11-S5.pdf [file 1752-153X-1-11-S5.pdf]

pValues

Schmuker, de Bruyne, Hähnel and Schneider

**Predicting olfactory receptor neuron responses from odorant structure – additional file 5**

| Rank | ab1D           | p-value | ab2A           | p-value | ab2B           | p-value | ab3A           | p-value | ab3B         | p-value |
|------|----------------|---------|----------------|---------|----------------|---------|----------------|---------|--------------|---------|
| 1    | std_dim3       | 0.0015  | PEOE_VSA_FPNEG | 0.0035  | PEOE_VSA_FPPOS | 0.0055  | balabanJ       | 0.0001  | SlogP_VSA8   | 0.0323  |
| 2    | PEOE_VSA_FPNEG | 0.0083  | a_ICM          |         | AM1_HOMO       |         | MNDO_HF        | 0.0003  | std_dim2     | 0.0429  |
| 3    | a_ICM          |         | PEOE_VSA_NEG   |         | AM1_IP         | 0.0109  | PEOE_VSA_FPPOS | 0.00037 | density      | 0.0460  |
| 4    | dens           | 0.0124  | apol           |         | PEOE_RPC+      | 0.0124  | FASA+          | 0.00044 | PEOE_VSA_POS | 0.0604  |
| 5    | Q_VSA_FNEG     |         | SMR_VSA5       | 0.0071  | FASA+          | 0.0161  | AM1_HOMO       |         | dens         |         |
| 6    | Q_VSA_FPOS     |         | chi1v_C        |         | MNDO_HF        | 0.0233  | PM3_HOMO       |         | balabanJ     |         |
| 7    | FCASA-         | 0.0141  | chi1_C         |         | chi1_C         |         | AM1_IP         |         | PEOE_VSA+0   | 0.0645  |
| 8    | Q_VSA_POS      |         | PEOE_RPC+      |         | PEOE_VSA_FHYD  |         | PM3_IP         | 0.0007  | PEOE_RPC-    |         |
| 9    | KierA3         | 0.0161  | PEOE_VSA_HYD   |         | PEOE_VSA_FPOL  |         | MNDO_HOMO      |         | PM3_HOMO     |         |
| 10   | Q_VSA_NEG      |         | a_hyd          |         | Q_VSA_FPPOS    | 0.0263  | MNDO_IP        | 0.0010  | PM3_IP       | 0.0836  |
| 11   | FASA-          | 0.0206  | SMR            | 0.0099  | MNDO_HOMO      |         | PEOE_VSA+5     |         | Q_VSA_PPOS   |         |
| 12   | a_nH           |         | chi0v_C        |         | MNDO_IP        |         | PEOE_VSA_POL   | 0.0014  | Kier2        |         |
| 13   | b_1rotR        |         | chi1v          |         | PM3_HOMO       |         | Q_RPC+         |         | Kier3        | 0.0891  |
| 14   | b_rotR         | 0.0233  | PEOE_VSA_FHYD  |         | PM3_IP         | 0.0334  | RPC+           | 0.0016  | AM1_HOMO     |         |
| 15   | density        | 0.0263  | PEOE_VSA_FPOL  |         | PEOE_VSA_PPOS  |         | b_1rotR        |         | AM1_IP       |         |
| 16   | SlogP_VSA7     | 0.0297  | E_str          |         | glob           | 0.0375  | PEOE_VSA_PNEG  |         | zagreb       | 0.1139  |
| 17   | Kier3          |         | mr             |         | PM3_LUMO       |         | PEOE_VSA_PPOS  | 0.0029  | KierA2       | 0.1210  |
| 18   | KierFlex       |         | SlogP          |         | FCASA+         | 0.0471  | PEOE_VSA_POS   |         | a_ICM        |         |
| 19   | SlogP_VSA4     |         | logP(o/w)      | 0.0138  | PEOE_VSA_FNEG  |         | FCASA+         | 0.0039  | KierA3       |         |
| 20   | glob           | 0.0334  | a_nC           |         | PEOE_VSA_FPOS  | 0.0526  | SlogP_VSA2     | 0.0045  | KierFlex     |         |
| 21   | vsa_acc        | 0.0375  | chi0_C         |         | Q_RPC+         |         | SlogP_VSA1     |         | SMR_VSA5     | 0.1617  |
| 22   | a_aro          |         | chi1           |         | RPC+           | 0.0653  | SMR_VSA0       | 0.0060  | VDistMa      |         |
| 23   | b_ar           | 0.0420  | PEOE_VSA-1     |         | AM1_LUMO       |         | PEOE_VSA+0     | 0.0091  | b_1rotR      |         |
| 24   | b_rotN         |         | rgyr           |         | PEOE_PC+       |         | a_nO           |         | b_rotR       |         |
| 25   | E              |         | vsa_hyd        | 0.0189  | PEOE_PC-       |         | PEOE_VSA_FHYD  |         | Q_VSA_FPPOS  |         |
| 26   | bpol           |         | weinerPath     |         | PEOE_VSA_POL   |         | PEOE_VSA_FPOL  |         | MNDO_HOMO    |         |
| 27   | SMR_VSA3       | 0.0471  | b_count        |         | E_str          |         | vsa_other      | 0.0118  | MNDO_IP      | 0.2016  |
| 28   | zagreb         |         | Q_VSA_HYD      |         | SMR_VSA6       | 0.0727  | b_1rotN        |         | VDistEq      |         |
| 29   | SMR_VSA0       | 0.0526  | SlogP_VSA1     |         | std_dim2       | 0.0894  | b_rotR         |         | b_1rotN      | 0.2127  |
| 30   | PEOE_VSA+0     | 0.0587  | vdw_vol        | 0.0256  | Q_RPC-         | 0.0989  | PEOE_VSA-5     | 0.0135  | FCASA-       | 0.2242  |

pValues

| ab5B           | p-value | ab6A        | p-value |
|----------------|---------|-------------|---------|
| KierA3         | 0.0010  | Kier3       | 0.0003  |
| KierA1         |         | Kier2       | 0.0017  |
| KierA2         |         | balabanJ    | 0.0026  |
| KierFlex       | 0.0064  | VDistEq     | 0.0037  |
| Kier2          |         | SlogP_VSA8  | 0.0056  |
| Kier3          | 0.0097  | KierA3      | 0.0066  |
| b_1rotR        | 0.0119  | KierA2      | 0.0079  |
| balabanJ       |         | std_dim2    | 0.0098  |
| rgyr           |         | b_rotR      | 0.0158  |
| std_dim1       | 0.0176  | b_1rotR     | 0.0226  |
| b_1rotN        |         | KierFlex    | 0.0304  |
| chi1v          | 0.0213  | b_rotN      | 0.0351  |
| Q_VSA_POS      | 0.0257  | MNDO_HF     |         |
| b_rotN         |         | FASA+       |         |
| MNDO_HF        | 0.0309  | FCASA+      | 0.0368  |
| VDistEq        |         | petitjean   |         |
| PEOE_VSA+0     | 0.0370  | petitjeanSC |         |
| std_dim2       | 0.0440  | MNDO_HOMO   |         |
| a_IC           |         | MNDO_IP     | 0.0424  |
| b_rotR         |         | diameter    | 0.0557  |
| bpol           | 0.0618  | E           |         |
| glob           | 0.0728  | PEOE_RPC+   | 0.0665  |
| SMR_VSA7       | 0.0854  | AM1_HOMO    |         |
| chi0v_C        | 0.0998  | AM1_IP      |         |
| FASA+          |         | Q_VSA_FPPOS |         |
| PEOE_PC+       |         | PM3_HOMO    |         |
| vsa_hyd        | 0.1161  | PM3_IP      |         |
| PEOE_VSA_FPPOS |         | SlogP_VSA4  | 0.0757  |
| PEOE_VSA_HYD   |         | rgyr        | 0.0824  |
| Kier1          | 0.1346  | zagreb      | 0.0859  |
