# Supplementary material for: Predicting olfactory receptor neuron responses from odorant structure
Source: PubMed Central journal article supplement (PMC1994056; doi:10.1186/1752-153x-1-11), 2007-05-04
Supplement: 1752-153X-1-11-S6.pdf [file 1752-153X-1-11-S6.pdf]

## Predicting olfactory receptor neuron responses from odorant structure — additional file 6

This table explains the meaning of the descriptors (adapted from the MOE user manual (Chemical Computing Group, Montreal, Canada)). Some descriptors occur in several variants, depending on the theory or algorithm underlying their calculation. For example, charge distribution for descriptors prefixed with Q was calculated using the MMFF94x force-field (1), while those prefixed with PEOE are based on calculations with the Partial Equalization of Orbital Electronegativities (PEOE) method proposed by Gasteiger and Marsili (2).

The following conventions are used in the table:

*n*: the number of atoms (not counting hydrogens);

*m*: the number of bonds (except bonds to hydrogen atoms);

*a*: the sum of  $(r_i/r_c - 1)$  where  $r_i$  is the covalent radius of atom *i*, and  $r_c$  is the covalent radius of a carbon atom;

$p_2$ : the number of paths of length 2 and  $p_3$  the number of paths of length 3 in the molecular graph.

Molecular descriptors and their meaning.

| Descriptor | Meaning                                                                                                                                                               |
|------------|-----------------------------------------------------------------------------------------------------------------------------------------------------------------------|
| AM1_HOMO   | Energy (eV) of the Highest Occupied Molecular Orbital calculated using the MOPAC AM1 Hamiltonian (3).                                                                 |
| AM1_IP     | Ionization potential (kcal/mol) calculated using the AM1 Hamiltonian (3).                                                                                             |
| AM1_LUMO   | Energy (eV) of the Lowest Unoccupied Molecular Orbital calculated using the MOPAC AM1 Hamiltonian (3).                                                                |
| E          | Value of the potential energy.                                                                                                                                        |
| E_str      | Bond stretch potential energy.                                                                                                                                        |
| FASA+      | Fractional ASA+ calculated as ASA+ / ASA.                                                                                                                             |
| FASA-      | Fractional ASA- calculated as ASA- / ASA.                                                                                                                             |
| FCASA+     | Fractional CASA+ calculated as CASA+ / ASA.                                                                                                                           |
| FCASA-     | Fractional CASA- calculated as CASA- / ASA.                                                                                                                           |
| Kier2      | Second kappa shape index: $(n - 1)^2 / m^2$ (4).                                                                                                                      |
| Kier3      | Third kappa shape index: $(n - 1) \cdot (n - 3)^2 / p_3^2$ for odd <i>n</i> , and $(n - 3) \cdot (n - 2)^2 / p_3^2$ for even <i>n</i> (4).                            |
| KierA1     | First alpha modified shape index: $s \cdot (s - 1)^2 / m^2$ where $s = n + a$ (4).                                                                                    |
| KierA2     | Second alpha modified shape index: $s \cdot (s - 1)^2 / m^2$ where $s = n + a$ (4).                                                                                   |
| KierA3     | Third alpha modified shape index: $(n - 1) \cdot (n - 3)^2 / p_3^2$ for odd <i>n</i> , and $(n - 3) \cdot (n - 2)^2 / p_3^2$ for even <i>n</i> where $s = n + a$ (4). |
| KierFlex   | Kier molecular flexibility index: (KierA1)·(KierA2)/ <i>n</i> (4)                                                                                                     |
| MNDO_HF    | Heat of formation (kcal/mol) calculated using the MNDO Hamiltonian (3).                                                                                               |
| MNDO_HOMO  | Energy (eV) of the Highest Occupied Molecular Orbital calculated using the MNDO Hamiltonian (3).                                                                      |

Molecular descriptors and their meaning (*cont.*).

| Descriptor          | Meaning                                                                                                                                                                                     |
|---------------------|---------------------------------------------------------------------------------------------------------------------------------------------------------------------------------------------|
| MNDO_IP             | Ionization potential (kcal/mol) calculated using the MNDO Hamiltonian (3).                                                                                                                  |
| PEOE_PC+            | Total positive partial charge: the sum of the positive partial charges                                                                                                                      |
| {Q, PEOE}_RPC+      | Relative positive partial charge: the largest positive $q_i$ divided by the sum of the positive $q_i$                                                                                       |
| {Q, PEOE}_RPC-      | Relative negative partial charge: the smallest negative $q_i$ divided by the sum of the negative $q_i$                                                                                      |
| {Q, PEOE}_VSA+0     | Sum of $v_i$ where $q_i$ is in the range [0.00,0.05)                                                                                                                                        |
| {Q, PEOE}_VSA+5     | Sum of per-atom van der Waals surface $v_i$ where $q_i$ is in the range [0.25,0.30)                                                                                                         |
| {Q, PEOE}_VSA-1     | Sum of $v_i$ where $q_i$ is in the range [-0.10,-0.05)                                                                                                                                      |
| {Q, PEOE}_VSA_FHYD  | Fractional hydrophobic van der Waals surface area                                                                                                                                           |
| {Q, PEOE}_VSA_FNEG  | Fractional negative van der Waals surface area                                                                                                                                              |
| {Q, PEOE}_VSA_FPNEG | Fractional negative polar van der Waals surface area                                                                                                                                        |
| {Q, PEOE}_VSA_FPOL  | Fractional polar van der Waals surface area                                                                                                                                                 |
| {Q, PEOE}_VSA_FPOS  | Fractional positive van der Waals surface area                                                                                                                                              |
| {Q, PEOE}_VSA_FPPOS | Fractional positive polar van der Waals surface area                                                                                                                                        |
| {Q, PEOE}_VSA_HYD   | Total hydrophobic van der Waals surface area                                                                                                                                                |
| {Q, PEOE}_VSA_NEG   | Total negative van der Waals surface area                                                                                                                                                   |
| {Q, PEOE}_VSA_PNEG  | Total negative polar van der Waals surface area                                                                                                                                             |
| {Q, PEOE}_VSA_POL   | Total polar van der Waals surface area                                                                                                                                                      |
| {Q, PEOE}_VSA_POS   | Total positive van der Waals surface area                                                                                                                                                   |
| {Q, PEOE}_VSA_PPOS  | Total positive polar van der Waals surface area                                                                                                                                             |
| PM3_HOMO            | Energy (eV) of the Highest Occupied Molecular Orbital calculated using the PM3 Hamiltonian (3).                                                                                             |
| PM3_IP              | Ionization potential (kcal/mol) calculated using the PM3 Hamiltonian (3).                                                                                                                   |
| PM3_LUMO            | Energy (eV) of the Lowest Unoccupied Molecular Orbital calculated using the PM3 Hamiltonian (3).                                                                                            |
| RPC+                | Same as Q_RPC+                                                                                                                                                                              |
| SMR                 | Molecular refractivity, calculated by an atomic contribution model (5)                                                                                                                      |
| SMR_VSA0            | Sum of the approximate accessible van der Waals surface area $v_i$ such that the contribution to Molar Refractivity for atom $i$ ( $R_i$ ) is in [0,0.11]                                   |
| SMR_VSA5            | Sum of $v_i$ such that $R_i$ is in (0.15,0.20]                                                                                                                                              |
| SMR_VSA7            | Sum of $v_i$ such that $R_i > 0.56$                                                                                                                                                         |
| SlogP               | Log of the octanol/water partition coefficient, calculated by an atomic contribution model (5)                                                                                              |
| SlogP_VSA1          | Sum of $v_i$ such that the contribution to logP(o/w) for atom $i$ ( $L_i$ ) is in (-0.4,-0.2]                                                                                               |
| SlogP_VSA2          | Sum of $v_i$ such that $L_i$ is in (-0.2,0]                                                                                                                                                 |
| SlogP_VSA4          | Sum of $v_i$ such that $L_i$ is in (0.1,0.15]                                                                                                                                               |
| SlogP_VSA7          | Sum of $v_i$ such that $L_i$ is in (0.25,0.30]                                                                                                                                              |
| SlogP_VSA8          | Sum of $v_i$ such that $L_i$ is in (0.30,0.40]                                                                                                                                              |
| VDistEq             | If $m$ is the sum of the distance matrix entries then VdistEq is defined to be the sum of $\log_2 m - p_i \log_2 p_i / m$ where $p_i$ is the number of distance matrix entries equal to $i$ |

Molecular descriptors and their meaning (*cont.*).

| Descriptor | Meaning                                                                                                                                                                                                                                                                               |
|------------|---------------------------------------------------------------------------------------------------------------------------------------------------------------------------------------------------------------------------------------------------------------------------------------|
| VDistMa    | If $m$ is the sum of the distance matrix entries then VDistMa is defined to be the sum of $\log_2 m - D_{ij} \log_2 D_{ij} / m$ over all $i$ and $j$ .                                                                                                                                |
| a_ICM      | Atom information content (mean). Let $n_i$ be the number of occurrences of atomic number $i$ in the molecule. Let $p_i = n_i/n$ where $n$ is the sum of the $n_i$ . The value of a_ICM is the negative of the sum over all $i$ of $p_i \log p_i$ .                                    |
| a_IC       | Atom information content (total). This is calculated to be a_ICM times $n$ .                                                                                                                                                                                                          |
| a_aro      | Number of aromatic atoms                                                                                                                                                                                                                                                              |
| a_hyd      | Number of hydrophobic atoms                                                                                                                                                                                                                                                           |
| a_nC       | Number of carbon atoms                                                                                                                                                                                                                                                                |
| a_nH       | Number of hydrogen atoms                                                                                                                                                                                                                                                              |
| a_nO       | Number of oxygen atoms                                                                                                                                                                                                                                                                |
| apol       | Sum of the atomic polarizabilities, with polarizabilities taken from (6)                                                                                                                                                                                                              |
| b_1rotN    | Number of rotatable single bonds (not including conjugated single bonds, such as peptide and ester bonds)                                                                                                                                                                             |
| b_1rotR    | Fraction of rotatable single bonds                                                                                                                                                                                                                                                    |
| b_ar       | Number of aromatic bonds                                                                                                                                                                                                                                                              |
| b_rotN     | Number of rotatable bonds                                                                                                                                                                                                                                                             |
| b_rotR     | Fraction of rotatable bonds                                                                                                                                                                                                                                                           |
| balabanJ   | Balaban's connectivity topological index (7)                                                                                                                                                                                                                                          |
| bpol       | Sum of the absolute value of the difference between atomic polarizabilities of all bonded atoms in the molecule (including implicit hydrogens) with polarizabilities taken from (6)                                                                                                   |
| chi0_C     | Carbon connectivity index (order 0). This is calculated as the sum of $1/\sqrt{d_i}$ , with $d_i$ the number of bonded non-hydrogen atoms, over all carbon atoms $i$ with $d_i > 0$                                                                                                   |
| chi0v_C    | Carbon valence connectivity index (order 0). This is calculated as the sum of $1/\sqrt{v_i}$ over all carbon atoms $i$ with $v_i > 0$ , with $v_i = (p_i - h_i)/(Z_i - p_i - 1)$ where $p_i$ is the number of $s$ and $p$ valence electrons and $Z_i$ the atomic number of atom $i$ . |
| chi1       | Atomic connectivity index (order 1) from (4) and (8). This is calculated as the sum of $1/\sqrt{d_i d_j}$ over all bonds between heavy atoms $i$ and $j$ where $i < j$                                                                                                                |
| chi1_C     | Carbon connectivity index (order 1). This is calculated as the sum of $1/\sqrt{d_i d_j}$ over all bonds between carbon atoms $i$ and $j$ where $i < j$                                                                                                                                |
| chi1v      | Atomic valence connectivity index (order 1) from (4) and (8). This is calculated as the sum of $1/\sqrt{v_i v_j}$ over all bonds between heavy atoms $i$ and $j$ where $i < j$                                                                                                        |
| chi1v_C    | Carbon valence connectivity index (order 1). This is calculated as the sum of $1/\sqrt{v_i v_j}$ over all bonds between carbon atoms $i$ and $j$ where $i < j$                                                                                                                        |
| dens       | Mass density: molecular weight divided by van der Waals volume (calculated using a grid approximation with spacing 0.75 Å)                                                                                                                                                            |

Molecular descriptors and their meaning (*cont.*).

| Descriptor  | Meaning                                                                                                                                                                                                                                                           |
|-------------|-------------------------------------------------------------------------------------------------------------------------------------------------------------------------------------------------------------------------------------------------------------------|
| density     | Molecular mass density: Weight divided by the van der Waals volume (calculated using a connection table approximation)                                                                                                                                            |
| diameter    | Largest value in the distance matrix (9).                                                                                                                                                                                                                         |
| glob        | Globularity, or inverse condition number (smallest eigenvalue divided by the largest eigenvalue) of the covariance matrix of atomic coordinates. A value of 1 indicates a perfect sphere while a value of 0 indicates a two- or one-dimensional object.           |
| logP(o/w)   | Log of the octanol/water partition coefficient, calculated from a linear atom type model implemented in MOE                                                                                                                                                       |
| mr          | Molecular refractivity, calculated from an 11 descriptor linear model implemented in MOE                                                                                                                                                                          |
| petitjean   | Value of (diameter-radius) / diameter, with diameter the largest value in the distance matrix and radius defined as follows: If $r_i$ is the largest matrix entry in row $i$ of the distance matrix $D$ , then radius is defined as the smallest of the $r_i$ (9) |
| petitjeanSC | Petitjean graph Shape Coefficient as defined in (9): (diameter-radius) / radius                                                                                                                                                                                   |
| rgyr        | Radius of gyration                                                                                                                                                                                                                                                |
| std_dim1    | Standard dimension 1: the square root of the largest eigenvalue of the covariance matrix of the atomic coordinates. A standard dimension is equivalent to the standard deviation along a principal component axis                                                 |
| std_dim2    | Standard dimension 2: the square root of the second largest eigenvalue of the covariance matrix of the atomic coordinates                                                                                                                                         |
| std_dim3    | Standard dimension 3: the square root of the third largest eigenvalue of the covariance matrix of the atomic coordinates                                                                                                                                          |
| vsa_acc     | Approximation to the sum of VDW surface areas of pure hydrogen bond acceptors (not counting acidic atoms and atoms that are both hydrogen bond donors and acceptors such as -OH)                                                                                  |
| Zagreb      | Zagreb index: the sum of $d_i^2$ over all heavy atoms $i$ , with $d_i$ the number of non-hydrogen atoms to which atom $i$ is bonded                                                                                                                               |

## References

- [1] Halgren TA: **MMFF VI. MMFF94s option for energy minimization studies.** *Journal of Computational Chemistry* 1999, **20**:720–729.
- [2] Gasteiger J, Marsili M: **Iterative Partial Equalization of Orbital Electronegativity - A Rapid Access to Atomic Charges.** *Tetrahedron* 1980, **36**:3219.
- [3] Stewart JJP: *MOPAC Manual*. 7th 1993.

- [4] Hall LH, Kier LB: *Reviews in Computational Chemistry*, Indianapolis: Purdue University at Indianapolis, *Volume 2* 1991 chap. The Molecular Connectivity Chi Indexes and Kappa Shape Indexes in Structure-Property Modeling, :367–422.
- [5] Wildman S, Crippen G: **Prediction of Physicochemical Parameters by Atomic Contributions**. *Journal of Chemical Information and Modeling* 1999, **39**(5):868–873, [[<http://dx.doi.org/10.1021/ci9903071>]].
- [6] CRC: *CRC Handbook of Chemistry and Physics*. CRC Press 1994.
- [7] Balaban A: **Highly Discriminating Distance-Based Topological Index**. *Chemical Physics Letters* 1982, **89**:399–404.
- [8] Hall LH, Kier LB: **The Nature of Structure-Activity Relationships and Their Relation to Molecular Connectivity**. *European Journal of Medicinal Chemistry* 1977, **12**:307–312.
- [9] Petitjean M: **Applications of the Radius-Diameter Diagram to the Classification of Topological and Geometrical Shapes of Chemical Compounds**. *Journal of Chemical Information and Computer Science* 1992, **32**:331–337.
